# Supplementary material
Source: PubMed Central journal article supplement (PMC5526695)
Supplement: NIHMS874922-supplement-Supp_PDF_-_Investigators.pdf [file NIHMS874922-supplement-Supp_PDF_-_Investigators.pdf]

## DPPOS Research Group Investigators

### **SUPPLEMENTAL MATERIAL**

#### **Pennington Biomedical Research Center (Baton Rouge, LA)**

George A. Bray, MD\*  
Kishore Gadde, MD\*  
Annie Chatellier, RN, CCRC\*\*  
Jennifer Arceneaux RN, BSN\*\*  
Amber Dragg RD, LDN\*\*  
Crystal Duncan, LPN  
Frank L. Greenway, MD  
Daniel Hsia, MD  
Erma Levy, RD  
Monica Lockett, LPN  
Donna H. Ryan, MD

#### **University of Chicago (Chicago, IL)**

David Ehrmann, MD\*  
Margaret J. Matulik, RN, BSN\*\*  
Kirsten Czech, MS  
Catherine DeSandre, BA

#### **Jefferson Medical College (Philadelphia, PA)**

Barry J. Goldstein, MD, PhD\*  
Kevin Furlong, DO\*  
Kellie A. Smith, RN, MSN\*\*  
Wendi Wildman, RN\*\*  
Constance Pepe, MS, RD  
Tracie Juliano (CAC)  
Patricia Wright (CAC)  
Evelyn Rios (CAC)  
Elaine Liebenbaum (Fundus)  
Stefanie Carey (Fundus)

#### **University of Miami (Miami, FL)**

Ronald B. Goldberg, MD\*  
Jeanette Calles, MSED\*\*  
Juliet Ojito, RN\*\*  
Sumaya Castillo-Florez, MPH  
Hermes J. Florez, MD, PhD  
Anna Giannella, RD, MS  
Olga Lara  
Beth Veciana

#### **The University of Texas Health Science Center (San Antonio, TX)**

Steven M. Haffner, MD, MPH\*  
Helen P. Hazuda, PhD\*  
Maria G. Montez, RN, MSHP, CDE\*\*  
Kathy Hattaway, RD, MS  
Carlos Lorenzo, MD, PhD  
Arlene Martinez, RN, BSN, CDE  
Tatiana Walker, RD, MS, CDE

#### **University of Colorado (Denver, CO)**

Richard F. Hamman, MD, DrPH\*

Dana Dabelea, MD, PhD\*  
Lisa Testaverde, MS\*\*  
Denise Anderson, RN, BSN  
Alexis Bouffard, MA, RN, BSN  
Tonya Jenkins, RD, CDE  
Dione Lenz, RN, BSN, CDE  
Leigh Perreault, MD  
David W. Price, MD  
Sheila C. Steinke, MS

#### **Joslin Diabetes Center (Boston, MA)**

Edward S. Horton, MD\*  
Catherine S. Poirier, RN, BSN\*\*  
Kati Swift, RN, BSN\*\*  
Enrique Caballero, MD  
Barbara Fagnoli, RD  
Ashley Guidi, BS  
Mathew Guido, BA  
Sharon D. Jackson, MS, RD, CDE  
Lori Lambert, MS, RD, LD  
Kathleen E. Lawton, RN  
Sarah Ledbury, Med, RD  
Jessica Sansoucy, BS  
Jeanne Spellman, RD

#### **VA Puget Sound Health Care System and University of Washington (Seattle, WA)**

Steven E. Kahn, MB, ChB\*  
Brenda K. Montgomery, RN, BSN, CDE\*\*  
Wilfred Fujimoto, MD  
Robert H. Knopp, MD  
Edward W. Lipkin, MD  
Ivy Morgan-Taggart  
Anne Murillo, BS  
Lonnese Taylor, RN, BS  
April Thomas, RD, MPH, CDE  
Elaine C. Tsai, MD, MPH  
Dace Trence, MD

#### **University of Tennessee (Memphis, TN)**

Abbas E. Kitabchi, PhD, MD, FACP\*  
Samuel Dagogo-Jack, MD\*  
Mary E. Murphy, RN, MS, CDE, MBA\*\*  
Laura Taylor, RN, BSN, CDE\*\*  
Jennifer Dolgoff, RN, BSN\*\*  
Debra Clark, LPN  
Uzoma Ibebuogu, MD  
Helen Lambeth, RN, BSN  
Harriet Ricks  
Lily M.K. Rutledge, RN, BSN  
Judith E. Soberman, MD  
Kerry Hodges (CAC)  
Angela Swanger (CAC)  
Carolyn Milem, RN (DXA)

\* denotes Principal Investigator  
\*\* denotes Program Coordinator

DPPOS Research Group Investigators

Cornelia Bobo, RN (DXA)  
Joseph Mastellone (Fundus)  
**Northwestern University's Feinberg School of Medicine (Chicago, IL)**  
Mark E. Molitch, MD\*  
Boyd E. Metzger, MD\*  
Mariana K. Johnson, MS, RN\*\*  
Mimi M. Giles, MS, RD  
Diane Larsen, BS  
Samsam C. Pen, BA  
**Massachusetts General Hospital (Boston, MA)**  
David M. Nathan, MD\*  
Mary Larkin, MSN\*  
Charles McKittrick, BSN\*\*  
Heather Turgeon, BSN\*\*  
Ellen Anderson, MS, RD  
Laurie Bissett, MS, RD  
Kristy Bondi, BS  
Enrico Cagliero, MD  
Kali D'Anna  
Linda Delahanty, MS, RD  
Jose C. Florez, MD, PhD  
Valerie Goldman, MS, RD  
Peter Lou, MD  
Alexandra Poulos  
Elyse Raymond, BS  
Christine, Stevens  
Beverly Tseng  
**University of California-San Diego (San Diego, CA)**  
Elizabeth Barrett-Connor, MD\*  
Mary Lou Carrion-Petersen, RN, BSN\*\*  
Lauren N. Claravall, BS  
Jonalle M. Dowden, BS  
Javiva Horne, RD  
Diana Leos, RN, BSN  
Sundar Mudaliar, MD  
Jean Smith, RN  
Simona Szerdi Janisch, BS  
Karen Vejvoda, RN, BSN, CDE, CCRC  
Pam Emory (Fundus)  
Gabriel Balea (Fundus)  
Lauren Pearce (Fundus)  
Marlene Rico (Fundus)  
Margaret Wilson (Fundus)  
Lesley G. Taylor (Fundus)  
Mark Shaver (CAC)  
Lenny White (CAC)  
Peggy Wickwire (CAC)  
Patricia Arvo Miller (DXA)

**St. St. Luke's-Roosevelt Hospital (New York, NY)**  
F. Xavier Pi-Sunyer, MD\*  
Jane E. Lee, MS\*\*  
Sandra T. Foo, MD  
Susan Hagamen, MS, RN, CDE  
**Indiana University (Indianapolis, IN)**  
David G. Marrero, PhD\*  
Kieren J. Mather, MD\*  
Susie M. Kelly, RN, CDE\*\*  
Paula Putenney, RN\*\*  
Marcia A. Jackson\*\*  
Gina McAtee\*\*  
Ronald T. Ackermann, MD  
Carolyn M. Cantrell  
Edwin S. Fineberg, MD  
Angela Hadden (deceased)  
Mario S. Kirkman  
Erin O'Kelly Phillips  
Paris J. Roach, MD  
Cathy Smith (CAC)  
Thomas Egnatz, CRA (Fundus)  
Megan Fultz  
**Medstar Health Research Institute (Washington, DC)**  
Robert E. Ratner, MD\*  
Vanita Aroda, MD\*  
Sue Shapiro, RN, BSN, CCRC\*\*  
Catherine Bavidio-Arrage, MS, RD, LD  
Peggy Gibbs  
Gabriel Uwaifo, MD  
Renee Wiggins, RD  
**University of Southern California/UCLA Research Center (Alhambra, CA)**  
Mohammed F. Saad, MD\*  
Karol Watson, MD\*  
Medhat Botrous, MD\*\*  
Sujata Jinagouda, MD\*\*  
Maria Budget  
Claudia Conzues  
Perpetua Magpuri  
Kathy Ngo  
Kathy Xaphthalmous  
**Washington University (St. Louis, MO)**  
Neil H. White, MD, CDE\*  
Angela L. Brown, MD\*  
Samia Das, MS, MBA, RD, LD\*\*  
Prajakta Khare-Ranade, MSc, RDN, LD\*\*  
Tamara Stich, RN, MSN, CDE\*\*  
Ana Santiago, RN  
Cormarie Wernimont, RD, LD  
Rhonda Weeks (Fundus)

\* denotes Principal Investigator  
\*\* denotes Program Coordinator

## DPPOS Research Group Investigators

Jerrod Wehmeier (Fundus)

Tim Wright (Fundus)

Tim Street (CAC)

Mike Harrod (CAC)

### **Johns Hopkins School of Medicine (Baltimore, MD)**

Christopher D. Saudek, MD\* (deceased)

Sherita Hill Golden, MD, MHS, FAHA\*

Tracy Whittington, BS\*\*

Frederick L. Brancati, MD, MHS (deceased)

Jeanne M. Clark, MD

Alicia Greene

Dawn Jiggetts

Henry Mosley

John Reusing

Richard R. Rubin, PhD (deceased)

Shawne Stephens

Evonne Utsey

Dennis Cain (Fundus)

Judith Belt (Fundus)

David Emmert (Fundus)

Mark Herring (Fundus)

Jacqueline McDonald (Fundus)

Linda Fellon (CAC)

Deborah Cavey (CAC)

### **University of New Mexico (Albuquerque, NM)**

David S. Schade, MD\*

Karwyn S. Adams, RN, MSN\*\*

Claire Hemphill, RN, BSN\*\*

Penny Hyde, RN, BSN\*\*

Janene L. Canady, RN, CDE\*\*

Kathleen Colleran, MD

Ysela Gonzales, RN, MSN

Doris A. Hernandez-McGinnis

Carolyn King

Pearl Rael (Fundus)

Maurice Mackey (Fundus)

Elizabeth Sanchez (Fundus)

Joe Suelto (CAC)

Vanessa Garcia (DXA)

### **Albert Einstein College of Medicine (Bronx, NY)**

Jill Crandall, MD\*

Janet O. Brown, RN, MPH, MSN\*\*

Gilda Trandafirescu, MD\*\*

Elsie Adorno, BS

Helena Duffy, MS, C-ANP

Angela Goldstein, FNP-C, NPP, CSW

Jennifer Lukin, BA

Helen Martinez, RN, MSN, FNP-C

Dorothy Pompei, BA

Harry Shamoan, MD

Jonathan Scheindlin, MD

Elizabeth A. Walker, RN, DNSc, CDE

Judith Wylie-Rosett, EdD, RD

### **University of Pittsburgh (Pittsburgh, PA)**

Trevor Orchard, MD\*

Andrea Kriska, PhD\*

Susan Jeffries, RN, MSN\*\*

M. Kaye Kramer, BSN, MPH\*\*

Marie Smith, RN, BSN\*\*

Catherine Benchoff

Stephanie Guimond, BS

Jessica Pettigrew, CMA

Debra Rubinstein, MD

Linda Semler, MS, RD

Elizabeth Venditti, PhD

Valarie Weinzierl, MPH

Daniel Edmundowicz, MD (CAC)

### **University of Hawaii (Honolulu, HI)**

Richard F. Arakaki, MD\*

Narleen K. Baker-Ladao, BS\*\*

Mae K. Isonaga, RD, MPH\*\*

Nina E. Bermudez, MS

Marjorie K. Mau, MD

John S. Melish, MD

Robin E. Yamamoto, CDE, RD

### **Southwest American Indian Centers (Phoenix, AZ; Shiprock, NM; Zuni, NM)**

William C. Knowler, MD, DrPH\*

Norman Coeoyate\*\*

Alvera Enote\*\*

Mary A. Hoskin, RD, MS\*\*

Camille Natewa\*\*

Carol A. Percy, RN, MS\*\*

Kelly J. Acton, MD, MPH

Vickie L. Andre, RN, FNP

Roz Barber

Shandiin Begay, MPH

Brian C. Bucca, OD, FAAO

Sherron Cook

Jeff Curtis, MD

Charlotte Dodge

Matthew S. Doughty, MD

Jason Kurland, MD

Justin Glass, MD

Martia Glass, MD

Robert L. Hanson, MD, MPH

Louise E. Ingraham, MS, RD, LN

Kathleen M. Kobus, RNC-ANP

Jonathan Krakoff, MD

Catherine Manus, LPN

Cherie McCabe

\* denotes Principal Investigator

\*\* denotes Program Coordinator

DPPOS Research Group Investigators

Sara Michaels, MD  
Tina Morgan  
Julie A. Nelson, RD  
Christopher Piromalli, DO  
Robert J. Roy  
Sandra Sangster, RD  
Miranda Smart  
Darryl P. Tonemah, PhD  
Rachel Williams, FNP  
Charlton Wilson, MD  
Mark Horton, MD (Fundus)  
Doug Hassenpflug, OD (Fundus)  
Lisa Sumner, MD (DXA)

**George Washington University  
Biostatistics Center (DPP Coordinating  
Center, Rockville, MD)**

Sarah Fowler, PhD\*  
Marinella Temprosa, PhD\*  
Michael Larsen, PhD\*  
Tina Brenneman\*\*  
Hanna Sherif, MS\*\*  
Sharon L. Edelstein, ScM\*\*  
Solome Abebe, MS  
Julie Bamdad, MS  
Melanie Barkalow  
Joel Bethupu  
Tsedenia Bezabeh  
Nicole Butler  
Jackie Callaghan  
Caitlin E. Carter  
Costas Christophi, PhD  
Gregory M. Dwyer  
Mary Foulkes, PhD  
Yuping Gao  
Robert Gooding  
Adrienne Gottlieb  
Nisha Grover  
Heather Hoffman, PhD  
Ashley N. Hogan  
Kathleen Jablonski, PhD  
Richard Katz, MD  
Preethy Kolinjivadi, MS  
John M. Lachin, ScD  
Yong Ma, PhD  
Qing Pan, PhD  
Susan Reamer  
Alla Sapozhnikova  
**Lifestyle Resource Core**  
Elizabeth M. Venditti, PhD\*  
Andrea M. Kriska, PhD  
Linda Semler, MS, RD, LDN  
Valerie Weinzierl, MPH

**Central Biochemistry Laboratory (Seattle,  
WA)**

Santica Marcovina, PhD, ScD\*  
Greg Strylewicz, PhD\*\*  
John Albers, PhD

**Epidemiological Cardiology Research  
Center- Epicare (Winston-Salem, NC)**

Ronald J. Prineas, MD, PhD\*  
Zhuming Zhang, MD\*  
Elsayed Soliman, MD\*  
Teresa Alexander  
Charles Campbell, MS  
Yabing Li, MD

Sharon Hall  
Julie Hu, MSc  
Susan Hensley, BS

Lisa Keasler  
Yabing Li, MD  
Margaret Mills  
Tonya Taylor

**Fundus Photo Reading Center (Madison,  
WI)**

Ronald Danis, MD\*  
Matthew Davis, MD\*  
Larry Hubbard\*  
Ryan Endres\*\*  
Deborah Elsas\*\*  
Samantha Johnson\*\*

Vonnie Gama  
Anne Goulding

**Carotid Ultrasound**

Gregory Evans

**Neurocognitive Assessment Group**

Jose A. Luchsinger, MD, MPH  
Jennifer Manly, PhD

**NIH/NIDDK (Bethesda, MD)**

Judith Fradkin, MD  
Sanford Garfield, PhD

**Centers for Disease Control & Prevention  
(Atlanta, GA)**

Edward Gregg, PhD  
Ping Zhang, PhD

**University of Michigan (Ann Arbor, MI)**

William H. Herman, MD, MPH  
Michael Brändle, MD, MS  
Morton B. Brown, PhD

**Nutrition Coding Center (Columbia, SC)**

Elizabeth Mayer-Davis, PhD\*  
Robert R. Moran, PhD\*\*

**Quality of Well-Being Center (La Jolla,  
CA)**

Ted Ganiats, MD\*

\* denotes Principal Investigator  
\*\* denotes Program Coordinator

DPPOS Research Group Investigators

Andrew J. Sarkin, PhD\*\*

Naomi Katzir

Erik Groessl, PhD

**Coronary Artery Calcification Reading  
Center**

Matthew Budoff, MD

Chris Dailing

**Dual Energy X-ray Absorptiometry  
Reading Center**

Ann Schwartz, PhD

Caroline Navy

Lisa Palermo, MS

**\*Genetics Working Group**

Jose C. Florez, MD, PhD<sup>1, 2</sup>

David Altshuler, MD, PhD<sup>1, 2</sup>

Liana K. Billings, MD<sup>9, 10</sup>

Ling Chen, MS<sup>1</sup>

Maegan Harden, BS<sup>2</sup>

Robert L. Hanson, MD, MPH<sup>3</sup>

William C. Knowler, MD, DrPH<sup>3</sup>

Toni I. Pollin, PhD<sup>4</sup>

Alan R. Shuldiner, MD<sup>4</sup>

Kathleen Jablonski, PhD<sup>5</sup>

Paul W. Franks, PhD, MPhil, MS<sup>6, 7, 8</sup>

Marie-France Hivert, MD<sup>1</sup>

1=Massachusetts General Hospital

2=Broad Institute

3=NIDDK

4=University of Maryland

5=Coordinating Center

6=Lund University, Sweden

7=Umeå University, Sweden

8=Harvard School of Public Health

9=NorthShore University HealthSystem

10=University of Chicago Pritzker School of  
Medicine

\* denotes Principal Investigator

\*\* denotes Program Coordinator
